# Supplementary material for: Can patients be trained to expect shared decision making in clinical consultations? Feasibility study of a public library program to raise patient awareness
Source: PubMed Central journal article supplement (PMC6291239; doi:10.1371/journal.pone.0208449), 2018-12-12
Supplement: pone.0208449.s001.pdf [file pone.0208449.s001.pdf]

**Table: Qualitative analysis**

| Key component of feasibility | Main themes associated with the key component identified | +/- | Source and number of quotes      |                        |                               | Example of quote                                                                                                                                                                    |
|------------------------------|----------------------------------------------------------|-----|----------------------------------|------------------------|-------------------------------|-------------------------------------------------------------------------------------------------------------------------------------------------------------------------------------|
|                              |                                                          |     | Post-workshop discussion session | Facilitator evaluation | Public participant evaluation |                                                                                                                                                                                     |
| <b>Acceptability</b>         | General public as the target                             | +   | 1                                |                        |                               | <i>“It’s great to have an activity like this for the general public in a relaxed atmosphere”</i>                                                                                    |
|                              | Shared decision making and antibiotics as the subject    | +   |                                  |                        | 5                             | <i>“I learned about shared decision making”</i><br><i>“The activity fits with the priorities of funding agencies and governmental organisations on controlling antibiotics use”</i> |
|                              | Role of speakers                                         | +   |                                  |                        | 4                             | <i>“The speakers spoke in a simple way, this was a good point”</i>                                                                                                                  |
|                              | Discussion between speakers                              | +   | 1                                | 5                      | 11                            | <i>“Interesting dialogue between the speakers”</i>                                                                                                                                  |
|                              | Simplified terms                                         | +   |                                  |                        | 12                            | <i>“It was good that the language could be understood by ordinary people”</i>                                                                                                       |

|                             |                                  |   |   |   |    |                                                                                                                                   |
|-----------------------------|----------------------------------|---|---|---|----|-----------------------------------------------------------------------------------------------------------------------------------|
|                             | Clarity of the information       | + |   |   | 15 | <i>“The information presented was very clear and easy to understand”</i>                                                          |
|                             | Involvement of experts           | + |   | 5 | 5  | <i>“Presence of a physician”</i><br><i>“Presence of a specialist in scientific communication”</i>                                 |
|                             | Location                         | + |   |   | 1  | <i>“Libraries are a good location, good way to use libraries”</i>                                                                 |
| <b>Demand</b>               | Advertising                      | - | 4 | 4 | 3  | <i>“Important to have a good plan for publicity and do more advertising”</i>                                                      |
| <b>Implement-<br/>ation</b> | Collaboration of partners        | + | 1 |   |    | <i>“The activity needs the collaboration of all the actors; the public library, the trainers and the scientific communicator”</i> |
|                             | Availability of trainers         | + | 1 |   |    | <i>“Need to have backup if a trainer cannot attend”</i>                                                                           |
| <b>Practicability</b>       | Balance of time between speakers | - |   |   | 1  | <i>“More time for the physician”</i>                                                                                              |
|                             | Time for questions               | + |   | 1 | 5  | <i>“Good to have time for questions”</i>                                                                                          |
|                             |                                  | - |   | 1 | 4  | <i>“Allowing questions after the first part of the workshop to promote interactivity”</i><br><i>“More time for questions”</i>     |
|                             | Evidence-based content           | + |   |   | 2  | <i>“The content is based on evidence”</i>                                                                                         |

|                   |                        |   |   |   |   |                                                                                                                                                                        |
|-------------------|------------------------|---|---|---|---|------------------------------------------------------------------------------------------------------------------------------------------------------------------------|
|                   | Interactivity          | + |   | 1 | 6 | <i>“Good interactivity with the speakers”</i>                                                                                                                          |
|                   |                        | - | 1 |   |   | <i>“The format must not be too interactive if we do not want to lose control”</i>                                                                                      |
|                   | Length of the workshop | - |   | 1 | 1 | <i>“Make the workshop longer”</i>                                                                                                                                      |
|                   | Documentation          | + |   |   | 9 | <i>“The documents given out were helpful”</i>                                                                                                                          |
| <b>Adaptation</b> | Payment for speakers   | - | 1 |   |   | <i>“Trainers will need to be paid if you want to expand this because of the time it requires”</i>                                                                      |
|                   | Distance for speakers  | - | 2 |   |   | <i>“Trainers would prefer to train in a library in their own community, where they live”</i>                                                                           |
|                   | Format                 | + | 4 |   |   | <i>“Do not need to be adapted as a web tutorial”</i>                                                                                                                   |
|                   |                        | - | 3 |   | 1 | <i>“The activity could be transferred to a digital format or video to be presented on screens in the waiting rooms of medical clinics and more widely distributed”</i> |
|                   | Patient involvement    | - | 6 | 1 |   | <i>“Include a patient in the activity who could share his/her experience of engaging in shared decision making in his encounters with a health professional”</i>       |
|                   | Context                | - | 1 |   | 1 | <i>“The activity could be adapted to different contexts, such as emergency medicine”</i>                                                                               |

|                           |                                               |   |   |   |   |                                                                                                                                                                                                                                                                            |
|---------------------------|-----------------------------------------------|---|---|---|---|----------------------------------------------------------------------------------------------------------------------------------------------------------------------------------------------------------------------------------------------------------------------------|
| <b>Integration</b>        | Integration in the location of implementation | + | 1 |   |   | <i>“This activity fits well with the mission of public libraries”</i>                                                                                                                                                                                                      |
| <b>Expansion</b>          | Participants                                  | - | 4 | 1 | 2 | <i>“To expand the activity to include other type of participants maybe more typical to those encountered in regular family practice”</i><br><br><i>“Present to other groups such as schools (high schools), policemen, fire fighters, social groups, community groups”</i> |
| Limited- efficacy testing | Knowledge                                     | + | 1 |   |   | <i>“The program has led to a significant increase in the perception of knowledge gain”</i>                                                                                                                                                                                 |
|                           | Measurement                                   | + | 2 |   |   | <i>“The retrospective pre-post test allows participants to have a better understanding of what they are being asked to assess”</i>                                                                                                                                         |

+ : Most appreciated

- : To be improved or to be modified
